1 **Genome-scale metabolic network**  
2 **reconstruction of the chloroform-respiring**  
3 ***Dehalobacter restrictus* strain CF**

4 **Kevin Correia<sup>1</sup>, Hanchen Ho<sup>1</sup>, and Radhakrishnan Mahadevan<sup>1,2,\*</sup>**

5 <sup>1</sup>**Department of Chemical Engineering and Applied Chemistry, University of Toronto,**  
6 **Canada, ON**

7 <sup>2</sup>**Institute of Biomaterials and Biomedical Engineering, University of Toronto, Ontario,**  
8 **Canada**

9 Corresponding author:

10 Radhakrishnan Mahadevan\*

11 Email address: [krishna.mahadevan@utoronto.ca](mailto:krishna.mahadevan@utoronto.ca)

12 **ABSTRACT**

13 **Background.** Organohalide-respiring bacteria (OHRB) play an important role in the global halogen cycle  
14 and bioremediation of industrial sites contaminated with chlorinated organics. One notable OHRB is  
15 *Dehalobacter restrictus* strain CF, which is capable of respiring chloroform to dichloromethane. Improved  
16 bioremediation strategies could be employed with a greater understanding of *D. restrictus*' metabolism in  
17 isolate and community cultures. To this end, we reconstructed the genome-scale metabolic network of *D.*  
18 *restrictus* to study its metabolism in future studies using flux balance analysis.

19 **Method.** The RAST annotation server and Model SEED framework were used to obtain a draft metabolic  
20 network reconstruction. Additional curation was required for its acetyl-CoA sources, the Wood-Ljungdahl  
21 pathway, TCA cycle, electron transport chain, hydrogenase complexes, and formate dehydrogenase  
22 complexes.

23 **Results.** *iHH623* is the first curated genome-scale metabolic model in the Peptococcaceae family. It  
24 spans 1087 reactions and 983 metabolites, covering 623 genes (21% of all ORF's). Its potential sources  
25 of acetyl-CoA are pyruvate ferredoxin oxidoreductase, pyruvate formate lyase, acetyl-CoA synthetase,  
26 phosphate acetyltransferase, and CO-methylating acetyl-CoA synthase. NADPH may be regenerated by  
27 isocitrate dehydrogenase, malic enzyme, NADP-reducing hydrogenase, cytosolic formate dehydrogenase,  
28 ferredoxin-dependent bifurcating transhydrogenase, 5-methyltetrahydrofolate dehydrogenase, and 5-  
29 10-methylenetetrahydrofolate. Additional reactions that were added or removed to the *D. restrictus*  
30 reconstruction are discussed.

31 **Conclusions.** We reconstructed the genome-scale metabolic network of *D. restrictus* by obtaining an initial  
32 draft with the RAST server and Model SEED framework. Curation was required for *D. restrictus*' acetyl-  
33 CoA sources, TCA cycle, electron transport chain, hydrogenase complexes, and formate dehydrogenase  
34 complexes. This metabolic model can be used to decipher *D. restrictus*' metabolism in isolate and  
35 community cultures in future studies, or as a template to reconstruct the metabolic network of other  
36 Peptococcaceae species. The extensive curation of the draft metabolic network reconstruction highlights  
37 the need to be cautious of automated metabolic network reconstruction.

## 38 1 INTRODUCTION

39 Organohalide-respiring bacteria (OHRB) play an important role in the global halogen cycle and bioremedi-  
40 ation of industrial sites contaminated with chlorinated organics, such as chloroform, 1,1,1-trichloroethane  
41 and 1,1-dichloroethane (Jugder et al., 2016). One notable OHRB is *Dehalobacter restrictus* strain CF,  
42 which is capable of dechlorinating chloroform to dichloromethane (Grostern et al., 2010). Improved  
43 bioremediation strategies could be employed with a greater understanding of *D. restrictus*' metabolism in  
44 isolate and community cultures. We reconstructed the genome-scale metabolic network of *D. restrictus*  
45 CF, with the aim to better understand its metabolism in future studies using flux balance analysis (Orth  
46 et al., 2010).

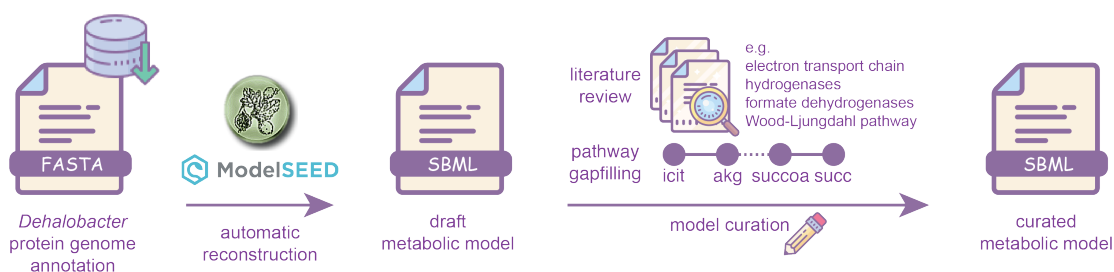

**Figure 1.** Genome-scale metabolic network reconstruction steps for *Dehalobacter restrictus* strain CF. A genome annotation was obtained from the RAST server, and a draft metabolic network with the Model SEED framework. Curation was required for central metabolism, including the electron transport chain, hydrogenases, formate dehydrogenases, and the Wood-Ljungdahl pathway. Pathway gapfilling was also performed to add reactions that were not captured in the draft reconstruction.

## 47 2 METHODS

48 **Draft and curated reconstruction.** A schematic for the reconstruction process is outlined in Figure 1.  
49 A genome annotation for *D. restrictus* strain CF (accession no. NC\_018866) (Tang et al., 2012) was  
50 obtained via the RAST server (Aziz et al., 2008), which was used to reconstruct a draft genome-scale  
51 metabolic model with the Model SEED framework (Devoid et al., 2013). The reconstructed metabolic  
52 network of *D. restrictus* was subsequently validated against its GenBank annotation and an in-house  
53 collection of manually-curated sequences. Reactions derived solely from hypothetical proteins, protein  
54 domains, or enzymes with ambiguous substrates were excluded. Redundant/lumped reactions were also  
55 removed. Genes with metabolic annotations not included in the initial draft reconstruction were reviewed  
56 for inclusion using PaperBLAST (Price and Arkin, 2017).

57 **Biomass equation.** Reactions to synthesize 1 gram of protein, RNA, DNA, peptidoglycan, and  
58 phospholipids from their precursors were added to the reconstruction, rather than having a lumped  
59 reaction of precursors to biomass, to allow the biomass composition to be easily manipulated. The amino  
60 acid composition of protein from *Bacillus subtilis* was used as the basis for *D. restrictus* (Dauner et al.,  
61 2001). The biomass composition was set to 50% protein, 10% RNA, 5% DNA, 5% phospholipid, 25%  
62 peptidoglycan, and 5% ash, which is consistent with slow-growing microbes. The growth associated  
63 maintenance (GAM) and non-growth associated maintenance (NGAM) were set to  $60 \text{ mmol} \cdot \text{gDCW}^{-1}$   
64 and  $19.2 \text{ mmol} \cdot \text{gDCW}^{-1} \cdot \text{day}^{-1}$ , respectively.

## 65 3 RESULTS & DISCUSSION

66 The *D. restrictus* metabolic model includes 1087 reactions and 983 metabolites, spanning 623 genes (21%  
67 of its ORF's). Model statistics are outlined in Table 1. Compartments include the cytoplasm, periplasm,  
68 inner membrane, and the extracellular.

69 **Acetyl-CoA metabolism.** In total there are five sources of acetyl-CoA in *D. restrictus*' metabolic  
70 network: pyruvate ferredoxin oxidoreductase, pyruvate formate lyase, acetyl-CoA synthetase, phosphate  
71 acetyltransferase, and CO-methylating acetyl-CoA synthase. These reactions expand the solution space  
72 and complicate FBA/FVA simulations without additional assumptions. Acetylphosphate acetyltransferase,  
73 CO dehydrogenase, and CO-methylating acetyl-CoA synthase from the Wood-Ljungdahl pathway were  
74 not part of the draft reconstruction.

75 **TCA cycle.** The TCA cycle in *D. restrictus* is not complete. Succinate dehydrogenase and fumarate  
76 reductase genes are absent in *D. restrictus*' genome (Wang et al., 2017); fumarate reductase was in the  
77 initial RAST annotation, but removed in the final reconstruction. Curiously, malate dehydrogenase is also  
78 absent in its genome (Wang et al., 2017), preventing the typical bifurcating TCA cycle present in many  
79 anaerobes (Amador-Noguez et al., 2010). Ferredoxin-dependent 2-oxoglutarate dehydrogenase from the  
80 TCA cycle was added to the reconstruction as it was absent in the RAST annotation.

81 **Redox metabolism.** Possible NADPH sources include malic enzyme, isocitrate dehydrogenase, bifur-  
82 cating transhydrogenase (NfnAB) with additional promiscuous activities, NADP-reducing hydrogenase  
83 (HynABCD), 5,10-methylenetetrahydrofolate dehydrogenase, 5-methyltetrahydrofolate dehydrogenase,  
84 and formate dehydrogenase. The electron transport chain, hydrogenases, and formate dehydrogenases  
85 reactions all required curation since they were not included in the initial Model SEED reconstruction.  
86 Their genes are outlined in Table 2.

87 **Hydrogenases.** There are four types of hydrogenases encoded in *D. restrictus*' genome: cytoplasmic  
88 ferredoxin-dependent [Fe-Fe]-hydrogenase (Hym-type), energy-conserving hydrogenase (Ech-type), [Ni-  
89 Fe]-uptake hydrogenase (Hup-type), and NADP-reducing hydrogenase (Hnd-type). Hnd-type was the  
90 only hydrogenase present in the draft reconstruction. The electron transfer between Hup-type hydrogenase  
91 to reductive dehalogenase has not been fully elucidated (Fincker and Spormann, 2017). For the sake of  
92 simplicity, reduced cytochrome b transfers electrons directly to menaquinone in our reconstruction, without  
93 any proton motive force. Similar to acetyl-CoA, the presence of multiple hydrogenases complicates flux  
94 balance analysis without additional assumptions.

95 Electron bifurcating transhydrogenase (NfnAB-type) is present in *D. restrictus*' genome but its activity  
96 and regulation are unknown. A characterized homolog has been shown to have various activities, but  
97 its dominant activity in *Moorella thermoacetica* is the reversible reduction of NADP via ferredoxin and  
98 NADH (Huang et al., 2012). NAD and NADP-dependent ferredoxin reductase were also included in the  
99 reconstruction.

100 **Electron transport chain.** Complex I, Hup-type hydrogenase, and energy-conserving formate de-  
101 hydrogenase are the entry points for electrons into the *D. restrictus* electron transport chain. The initial

102 RAST annotation had ubiquinone as an electron acceptor but was replaced with menaquinone in the final  
103 reconstruction. Non-energy-conserving NADH dehydrogenase was removed from the draft reconstruction  
104 as there is no strong genomic evidence in *D. restrictus*. All membrane-bound (S)-dihydroorotate dehy-  
105 drogenase reactions were also removed from the reconstruction; *D. restrictus* strain CF's genome only  
106 encodes a cytoplasmic NAD-dependent (S)-dihydroorotate dehydrogenase. The only known terminal  
107 electron acceptors in *D. restrictus* are chlorinated organics, via multiple encoded reductive dehalogenase  
108 operons (Tang and Edwards, 2013).

109 **Formate dehydrogenase.** *D. restrictus* has two additional formate dehydrogenase reactions: cyto-  
110 plasmic NAD(P)-dependent formate dehydrogenase, and the membrane-bound formate hydrogenlyase;  
111 these enzymes require molybdopterin, which cannot be synthesized by *D. restrictus* (Wang et al., 2017).

112 All tRNA ligase reactions were added to the reconstruction. Transport and exchange reactions for CO<sub>2</sub>,  
113 CO, H<sub>2</sub>, ammonium, chloroform, chlorinated ethenes, malate, pyruvate, glycerol, citrate, oxaloacetate,  
114 and all 20 amino acids were included. Demand reactions for all biomass precursors were added to help  
115 debug the model.

## 116 4 CONCLUSION

117 In summary, we reconstructed the metabolic network of *D. restrictus* to better understand its dechlorinating  
118 metabolism in isolate and community cultures. The model includes 623 genes, 1087 reactions, and 983  
119 metabolites. Curation was required for *D. restrictus*' acetyl-CoA sources, TCA cycle, electron transport  
120 chain, hydrogenase complexes, and formate dehydrogenase complexes. The presence of multiple reactions  
121 involved in the production and consumption of acetyl-CoA, H<sub>2</sub>, and NADPH expand the solution space  
122 in flux balance analysis and therefore require additional assumptions to be made with the aide of omics  
123 data. The extensive curation in the reconstruction process highlights the need to be cautious of automated  
124 metabolic network reconstruction, and the need for improved genome annotation.

## 125 5 ACKNOWLEDGMENTS

126 The authors acknowledge Po-Hsiang Wang for his advice on *Dehalobacter restrictus*' metabolism.

127 This project was supported by the Ontario Genomics SPARK grant.

## 128 REFERENCES

129 Amador-Noguez, D., Feng, X.-J., Fan, J., Roquet, N., Rabitz, H., and Rabinowitz, J. D. (2010). Systems-  
130 level metabolic flux profiling elucidates a complete, bifurcated tricarboxylic acid cycle in *Clostridium*  
131 *acetobutylicum*. *Journal of Bacteriology*, 192(17):4452–4461.

**Table 1.** Model statistics for the curated genome-scale metabolic network reconstruction of *Dehalobacter restrictus* strain CF. The reconstruction captures 21% of its genes.

| Subsystem          | Genes | Reactions | Metabolites |
|--------------------|-------|-----------|-------------|
| All reactions      | 623   | 1087      | 983         |
| DNA polymerase     | 16    | 1         |             |
| RNA polymerase     | 4     | 1         |             |
| Protein synthesis  | 57    | 2         |             |
| Metabolism         | 489   | 758       |             |
| Transporters       | 43    | 125       |             |
| Exchange reactions | 0     | 69        |             |
| Demand reactions   | 0     | 95        |             |

**Table 2.** Curated hydrogenase, bifurcating transhydrogenase, Complex I, and formate dehydrogenase complexes in the *Dehalobacter restrictus* strain CF metabolic network reconstruction. Localization of the complexes are listed.

| Enzyme                                         | Reaction                                                                                                                                                                   | Localization                | Locus tags                                         | References               |
|------------------------------------------------|----------------------------------------------------------------------------------------------------------------------------------------------------------------------------|-----------------------------|----------------------------------------------------|--------------------------|
| HymABC<br>[Fe-Fe] hydrogenase                  | $2 \text{ Oxidizedferredoxin}[c] + \text{H}_2[c] \leftrightarrow 2 \text{ H}^+[c] + 2 \text{ Reducedferredoxin}[c]$                                                        | cytoplasmic                 | DCF50.p1647-49<br>DCF50.p933-35                    | Kruse et al. (2015)      |
| EchABCDEF<br>Energy-conserving hydrogenase     | $2 \text{ Oxidizedferredoxin}[c] + \text{H}_2[c] + 2 \text{ H}^+[p] \leftrightarrow 4 \text{ H}^+[c] + 2 \text{ Reducedferredoxin}[c]$                                     | membrane bound              | DCF50.p837-42<br>DCF50.p2232-37                    | Welte et al. (2010)      |
| HupABC(D)<br>[Ni-Fe]-uptake hydrogenase        | $\text{H}_2[p] + \text{cytochrome-bd-ox}[i] \rightarrow 2 \text{ H}^+[p] + \text{cytochrome-bd-red}[i]$                                                                    | membrane bound, periplasmic | DCF50.p1849-52<br>DCF50.p1688-90<br>DCF50.p2131-33 | Volbeda et al. (2013)    |
| HndABCD<br>NAD(P)-reducing hydrogenase         | $\text{NAD(P)}[c] + \text{H}_2[c] \rightarrow \text{NAD(P)H}[c] + \text{H}^+[c]$                                                                                           | cytoplasmic                 | DCF50.p1597-600                                    | de Luca et al. (1998)    |
| NfnAB<br>Electron-bifurcating transhydrogenase | $\text{H}^+[c] + 2 \text{ NADP}[c] + \text{NADH}[c] + 2 \text{ Reducedferredoxin}[c] \leftrightarrow \text{NAD}[c] + 2 \text{ NADPH}[c] + 2 \text{ Oxidizedferredoxin}[c]$ | cytoplasmic                 | DCF50.p511-12                                      | Huang et al. (2012)      |
| NDH1<br>Complex I                              | $\text{NADH}[c] + 5 \text{ H}^+[c] + \text{Menaquinone } 8[i] \rightarrow \text{NAD}[c] + 4 \text{ H}^+[p] + \text{Menaquinol } 8[i]$                                      | membrane-bound, cytoplasmic | DCF50.p2293-303                                    | Brandt (2006)            |
| FdhAEFH<br>Formate dehydrogenase               | $\text{Formate}[c] + \text{NAD(P)}[c] \leftrightarrow \text{NAD(P)H}[c] + \text{CO}_2[c]$                                                                                  | cytoplasmic                 | DCF50.p1622-27                                     | Kruse et al. (2015)      |
| HycABCDEFGF<br>Formate hydrogenlyase           | $\text{Formate}[c] + \text{H}^+[c] \rightarrow \text{CO}_2[c] + \text{H}_2[c]$                                                                                             | membrane bound, cytoplasmic | DCF50.p760-66                                      | McDowall et al. (2014)   |
| FdoGHI<br>Formate dehydrogenase-N              | $\text{Formate}[p] + \text{H}^+[c] + \text{Menaquinone } 8[i] \rightarrow \text{CO}_2[p] + \text{Menaquinol } 8[i]$                                                        | membrane bound, periplasmic | DCF50.p923-27                                      | Wang and Gunsalus (2003) |

- 132 Aziz, R. K., Bartels, D., Best, A. A., DeJongh, M., Disz, T., Edwards, R. A., Formsma, K., Gerdes,  
133 S., Glass, E. M., Kubal, M., et al. (2008). The RAST server: rapid annotations using subsystems  
134 technology. *BMC Genomics*, 9(1):75.
- 135 Brandt, U. (2006). Energy converting NADH: quinone oxidoreductase (Complex I). *Annual Review of*  
136 *Biochemistry*, 75:69–92.
- 137 Dauner, M., Storni, T., and Sauer, U. (2001). *Bacillus subtilis* metabolism and energetics in carbon-limited  
138 and excess-carbon chemostat culture. *Journal of Bacteriology*, 183(24):7308–7317.
- 139 de Luca, G., de Philip, P., Rousset, M., Belaich, J. P., and Dermoun, Z. (1998). The NADP-  
140 reducing hydrogenase of *Desulfovibrio fructosovorans*: Evidence for a native complex with hydrogen-  
141 dependent methyl-viologen-reducing activity. *Biochemical and Biophysical Research Communications*,  
142 248(3):591–596.
- 143 Devoid, S., Overbeek, R., DeJongh, M., Vonstein, V., Best, A. A., and Henry, C. (2013). Automated  
144 genome annotation and metabolic model reconstruction in the SEED and Model SEED. In *Systems*  
145 *Metabolic Engineering*, pages 17–45. Springer.
- 146 Fincker, M. and Spormann, A. M. (2017). Biochemistry of catabolic reductive dehalogenation. *Annual*  
147 *Review of Biochemistry*, 86:357–386.
- 148 Grostern, A., Duhamel, M., Dworatzek, S., and Edwards, E. A. (2010). Chloroform respiration to  
149 dichloromethane by a *Dehalobacter* population. *Environmental Microbiology*, 12(4):1053–1060.
- 150 Huang, H., Wang, S., Moll, J., and Thauer, R. K. (2012). Electron bifurcation involved in the energy  
151 metabolism of the acetogenic bacterium *Moorella thermoacetica* growing on glucose or H<sub>2</sub> plus CO<sub>2</sub>.  
152 *Journal of Bacteriology*, pages JB–00385.
- 153 Jugder, B.-E., Ertan, H., Bohl, S., Lee, M., Marquis, C. P., and Manefield, M. (2016). Organohalide  
154 respiring bacteria and reductive dehalogenases: key tools in organohalide bioremediation. *Frontiers in*  
155 *Microbiology*, 7:249.
- 156 Kruse, T., van de Pas, B. A., Atteia, A., Krab, K., Hagen, W. R., Goodwin, L., Chain, P., Boeren, S.,  
157 Maphosa, F., Schraa, G., de Vos, W. M., van der Oost, J., Smidt, H., and Stams, A. J. M. (2015).  
158 Genomic, proteomic, and biochemical analysis of the organohalide respiratory pathway in *Desulfito-*  
159 *bacterium dehalogenans*. *Journal of Bacteriology*, 197(5):893–904.
- 160 McDowall, J. S., Murphy, B. J., Haumann, M., Palmer, T., Armstrong, F. A., and Sargent, F. (2014). Bacte-  
161 rial formate hydrogenlyase complex. *Proceedings of the National Academy of Sciences*, 111(38):E3948–  
162 E3956.
- 163 Orth, J. D., Thiele, I., and Palsson, B. Ø. (2010). What is flux balance analysis? *Nature Biotechnology*,  
164 28(3):245.

- 165 Price, M. N. and Arkin, A. P. (2017). PaperBLAST: text mining papers for information about homologs.  
166 *mSystems*, 2(4):e00039–17.
- 167 Tang, S. and Edwards, E. A. (2013). Identification of dehalobacter reductive dehalogenases that catal-  
168 yse dechlorination of chloroform, 1, 1, 1-trichloroethane and 1, 1-dichloroethane. *Philosophical*  
169 *Transactions of the Royal Society B*, 368(1616):20120318.
- 170 Tang, S., Gong, Y., and Edwards, E. A. (2012). Semi-automatic *in silico* gap closure enabled *de novo*  
171 assembly of two *Dehalobacter* genomes from metagenomic data. *PLoS One*, 7(12):e52038.
- 172 Volbeda, A., Darnault, C., Parkin, A., Sargent, F., Armstrong, F. A., and Fontecilla-Camps, J. C. (2013).  
173 Crystal structure of the O<sub>2</sub>-tolerant membrane-bound hydrogenase 1 from *Escherichia coli* in complex  
174 with its cognate cytochrome b. *Structure*, 21(1):184–190.
- 175 Wang, H. and Gunsalus, R. P. (2003). Coordinate regulation of the *Escherichia coli* formate dehydrogenase  
176 fdnGHI and fdhF genes in response to nitrate, nitrite, and formate: roles for NarL and NarP. *Journal of*  
177 *Bacteriology*, 185(17):5076–5085.
- 178 Wang, P.-H., Tang, S., Nemr, K., Flick, R., Yan, J., Mahadevan, R., Yakunin, A. F., Löffler, F. E., and  
179 Edwards, E. A. (2017). Refined experimental annotation reveals conserved corrinoid autotrophy in  
180 chloroform-respiring *Dehalobacter* isolates. *The ISME Journal*, 11(3):626.
- 181 Welte, C., Kallnik, V., Grapp, M., Bender, G., Ragsdale, S., and Deppenmeier, U. (2010). Function of Ech  
182 hydrogenase in ferredoxin-dependent, membrane-bound electron transport in *Methanosarcina mazei*.  
183 *Journal of Bacteriology*, 192(3):674–678.
